# Supplementary material for: PD-L1 Is an Independent Prognostic Marker in Middle Eastern PTC and Its Expression Is Upregulated by BRAFV600E Mutation
Source: MDPI journal article supplement (doi:10.3390/cancers13030555), 2021-02-01

# Figure S1. Uncropped Western Blot Images

## Figure 3A

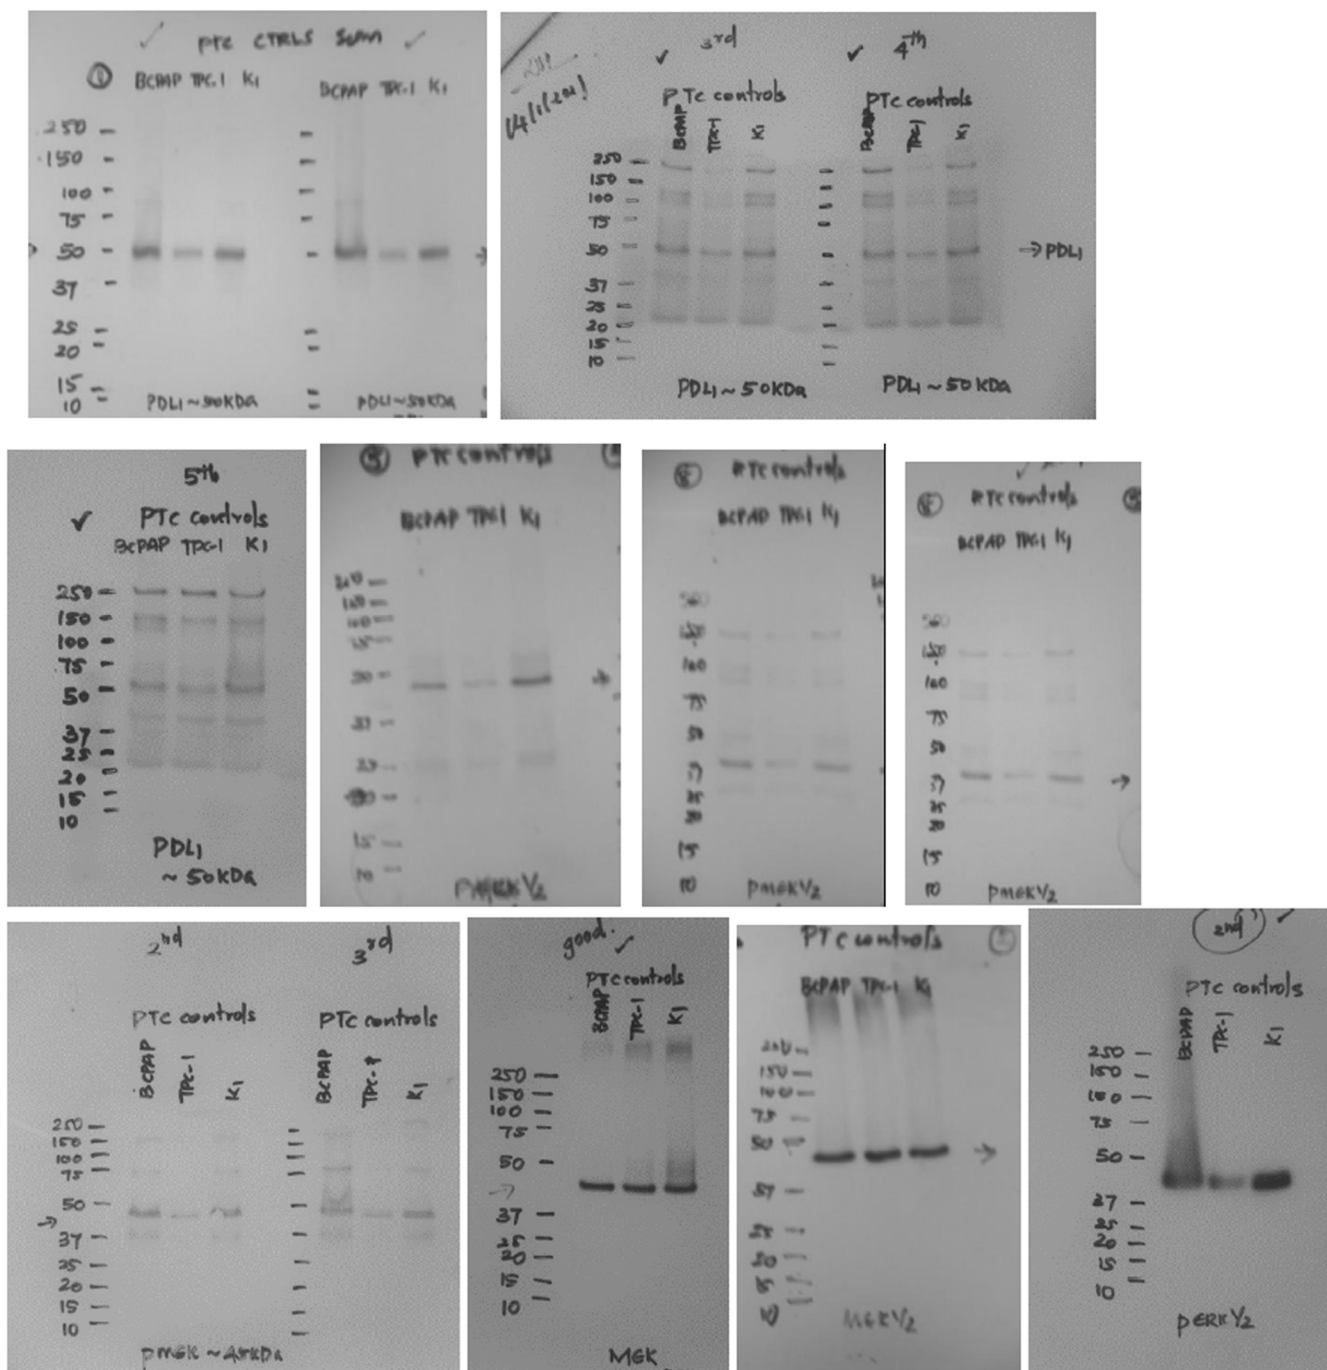

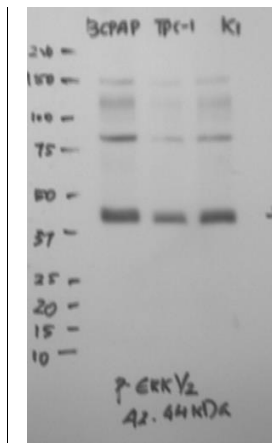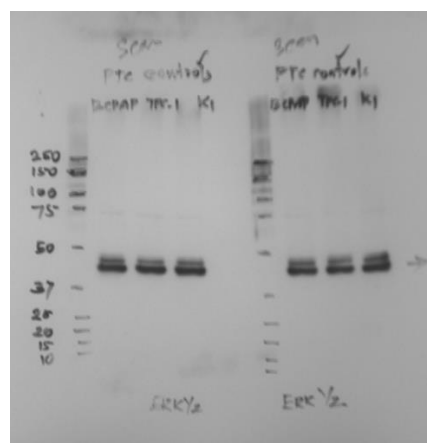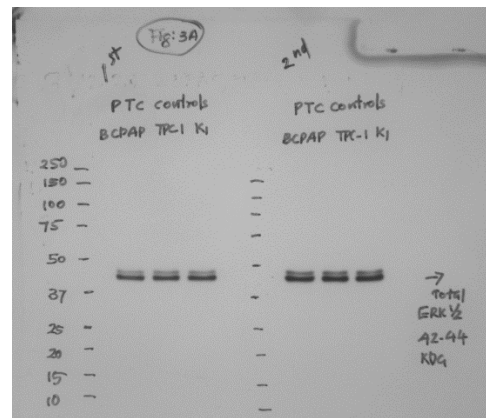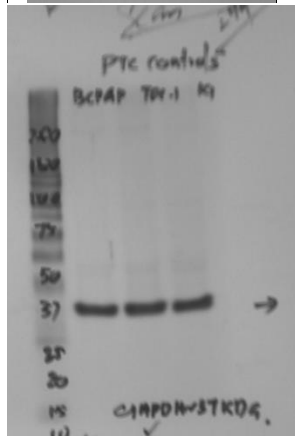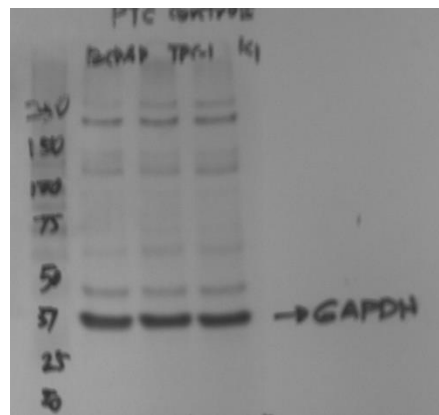

Figure 3C

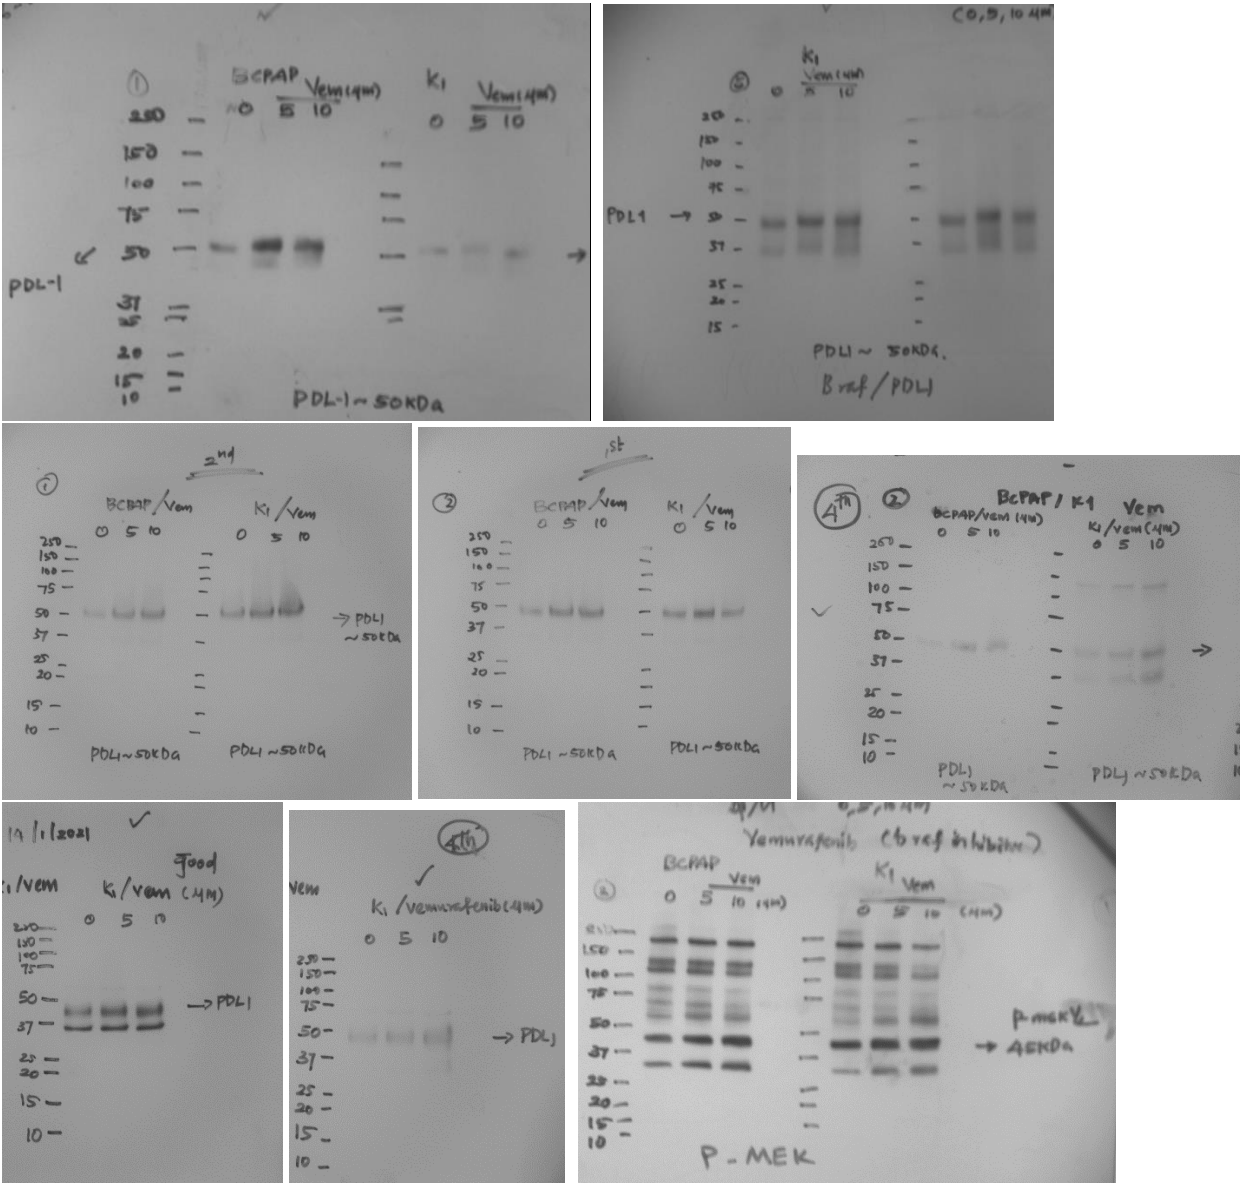

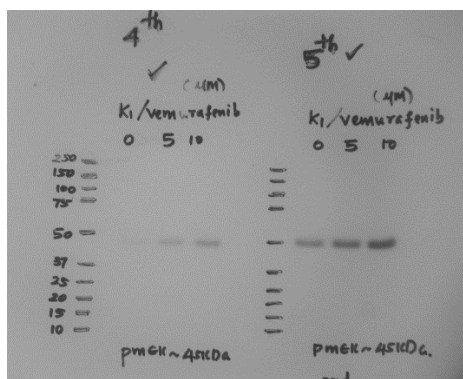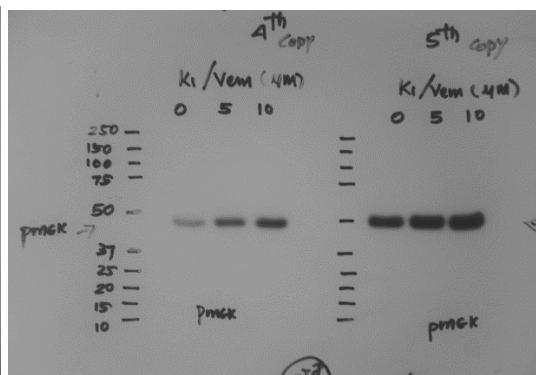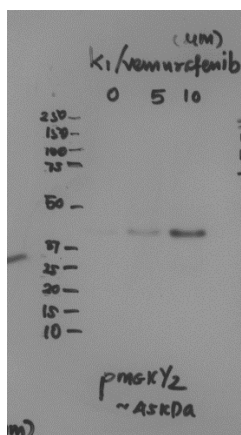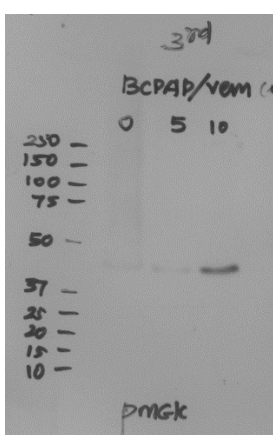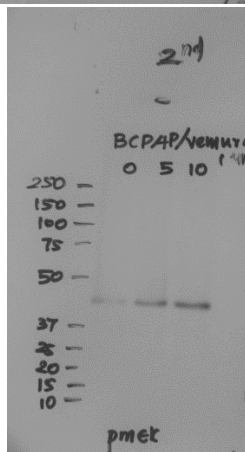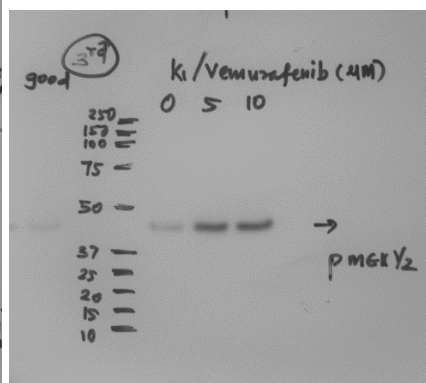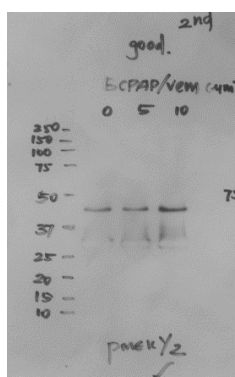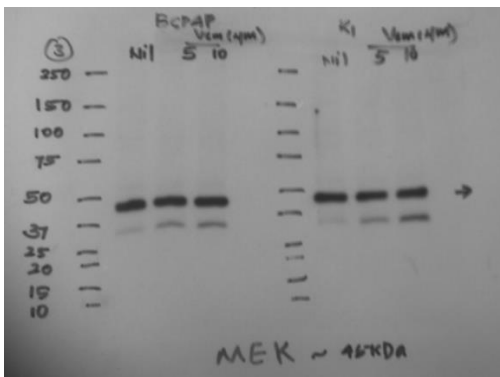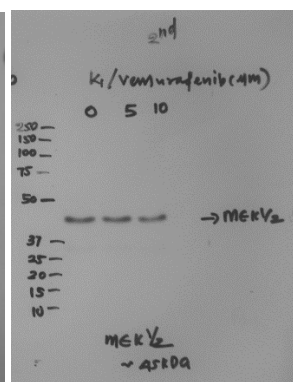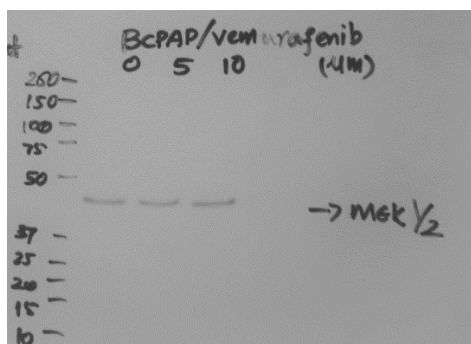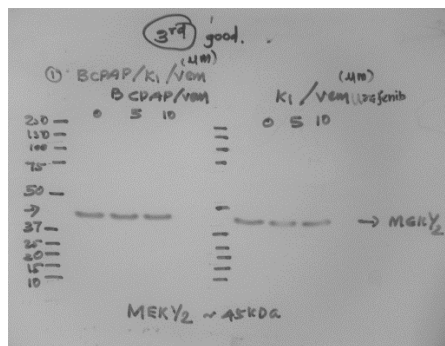

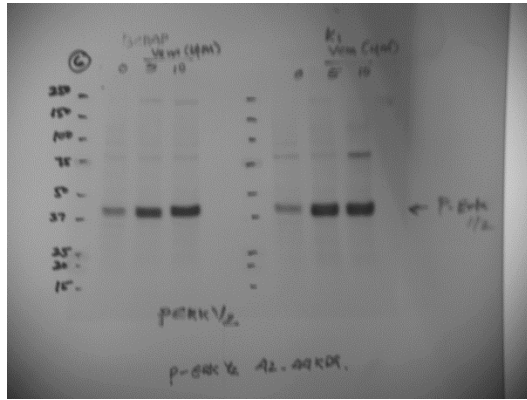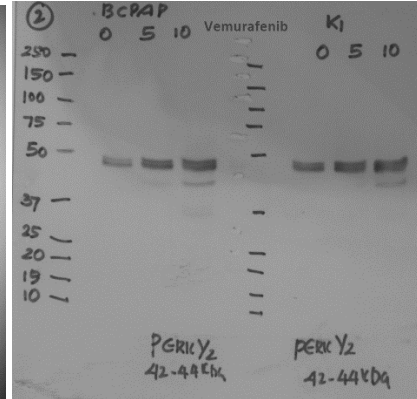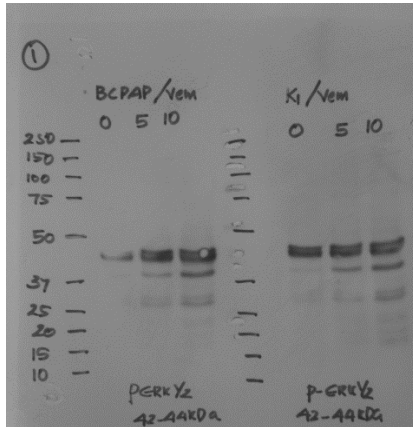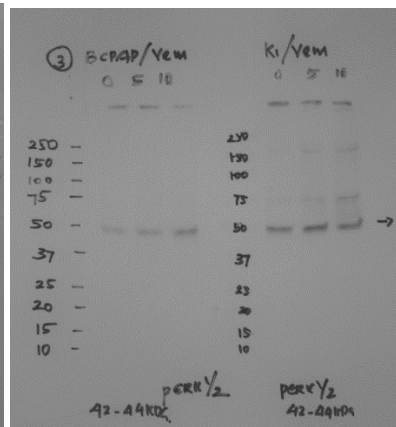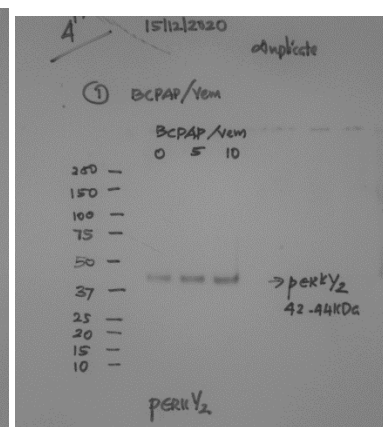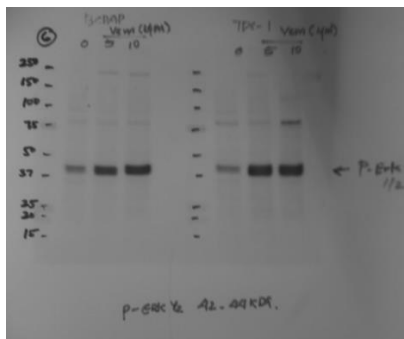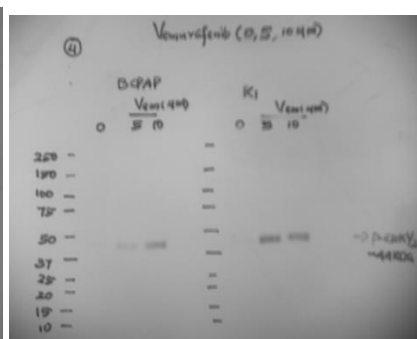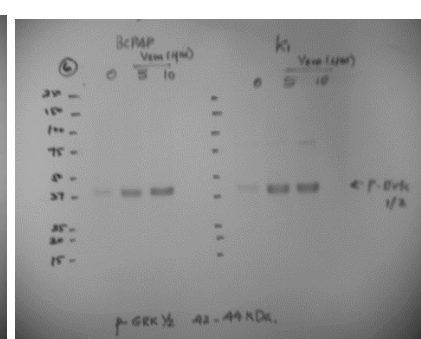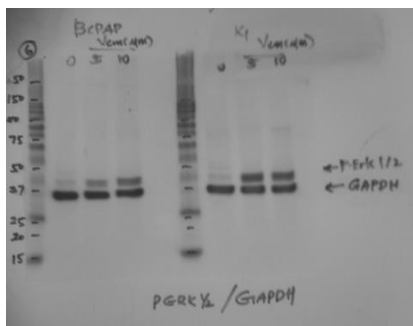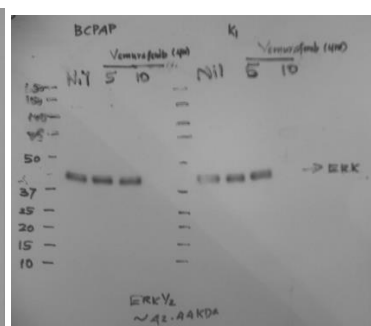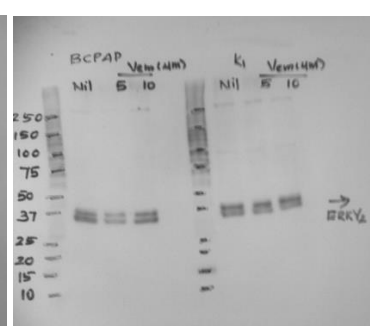

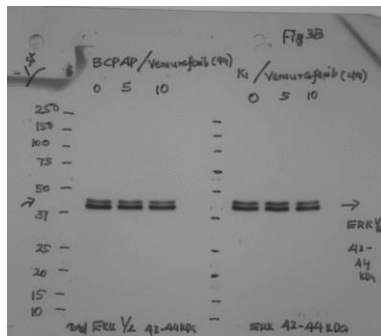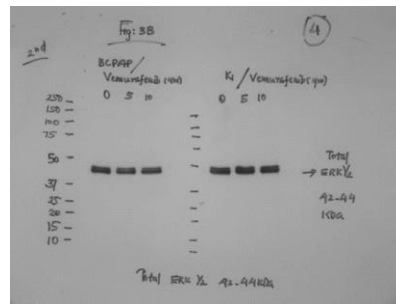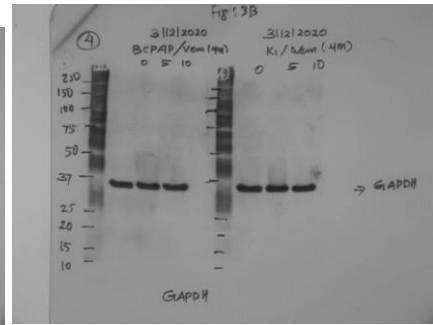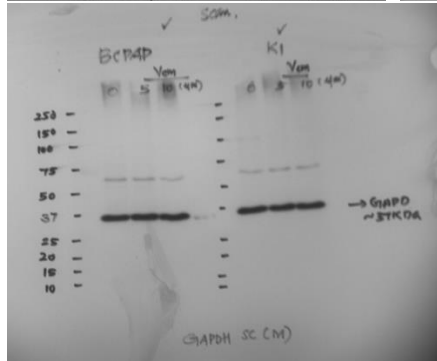

Figure 4A

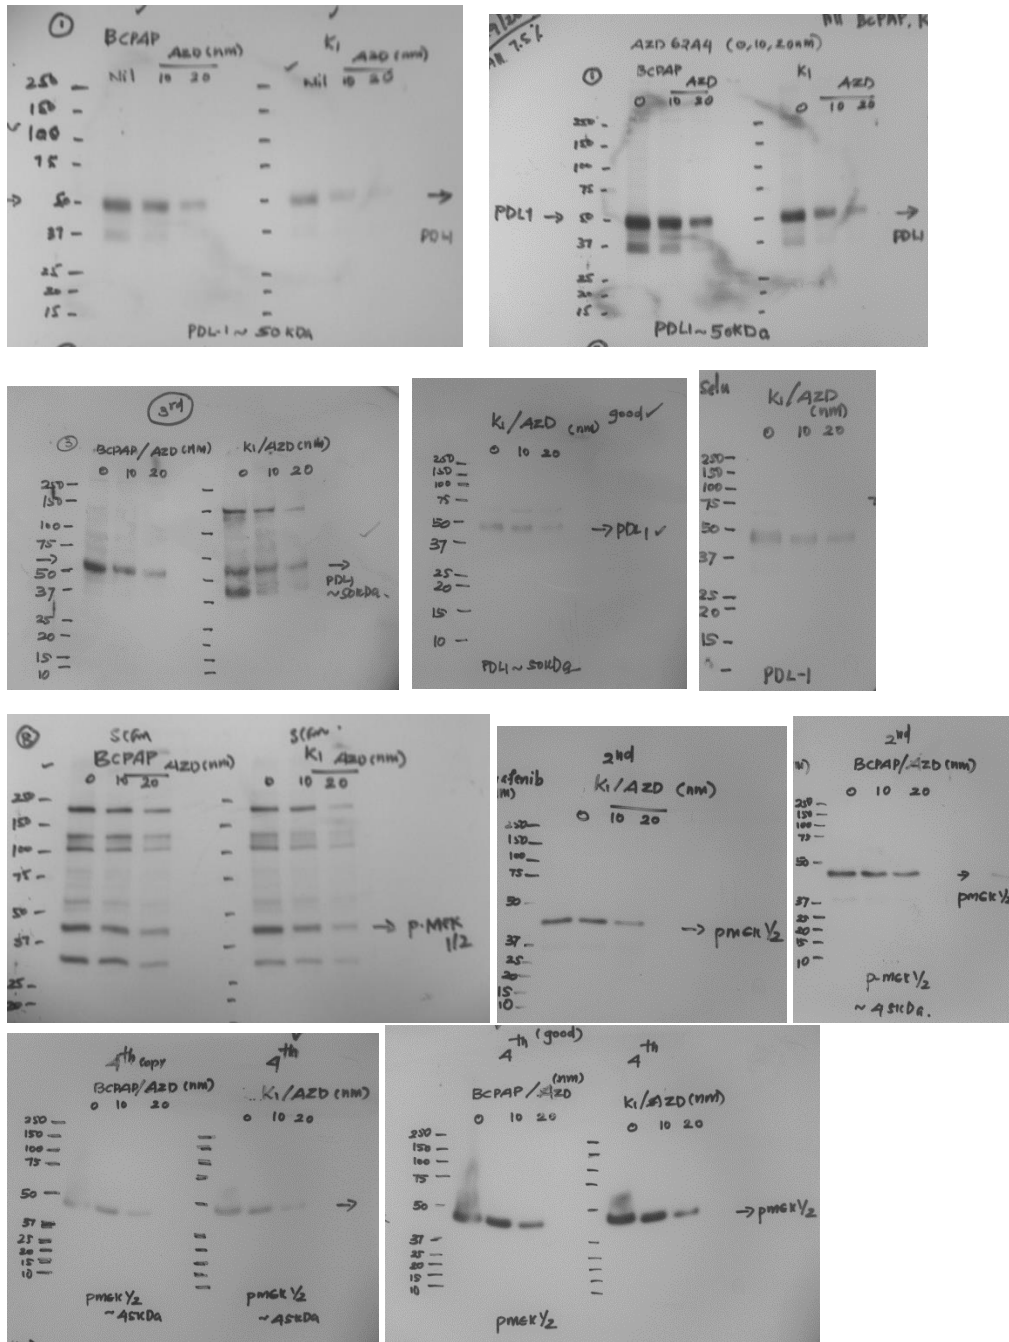



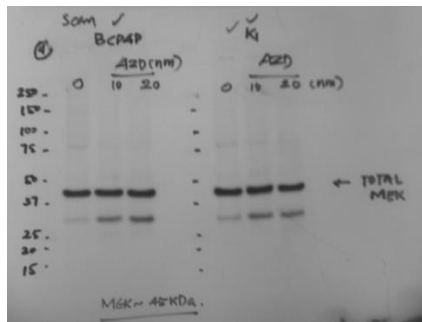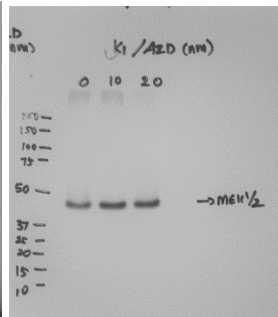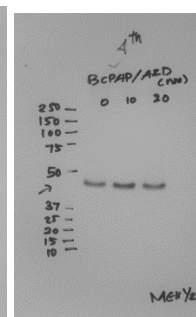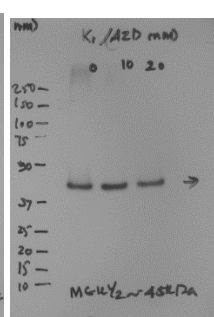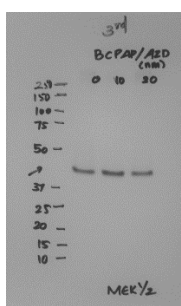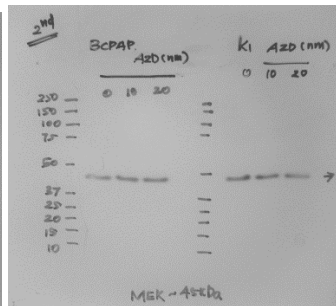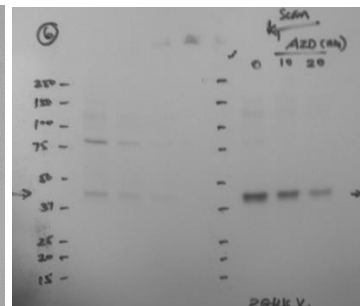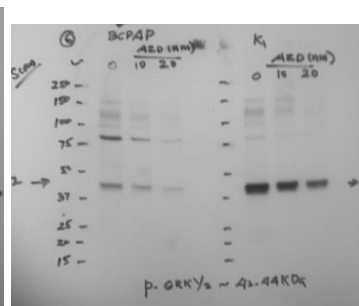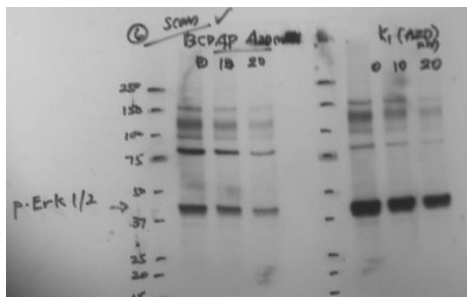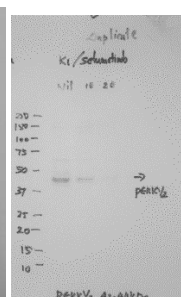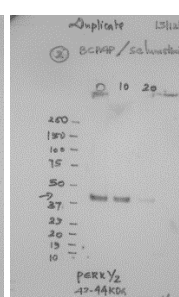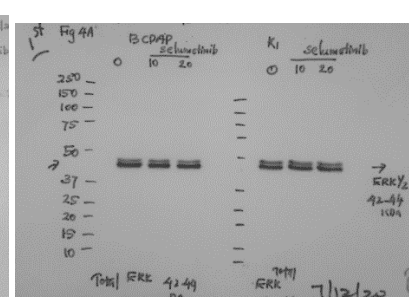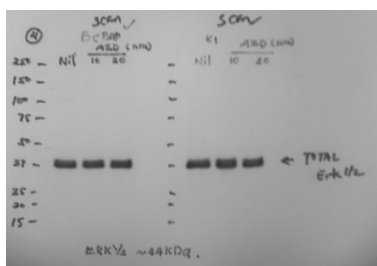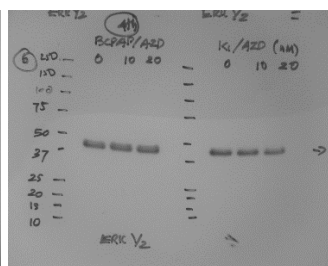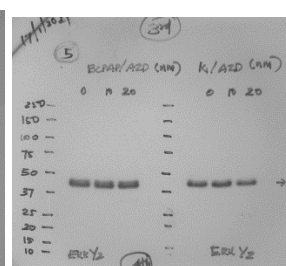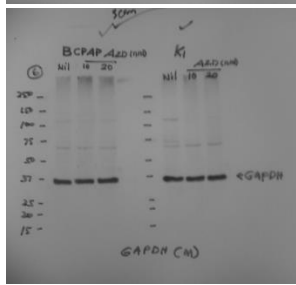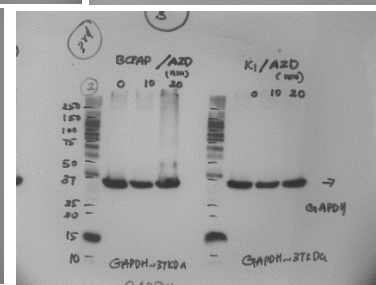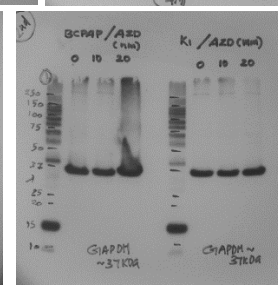



Figure 5C and E

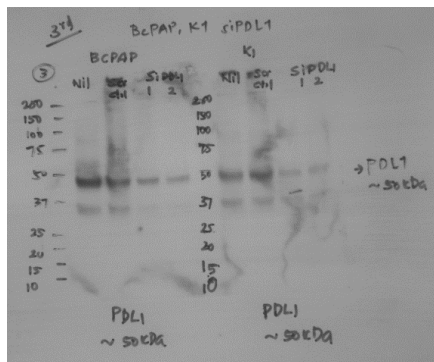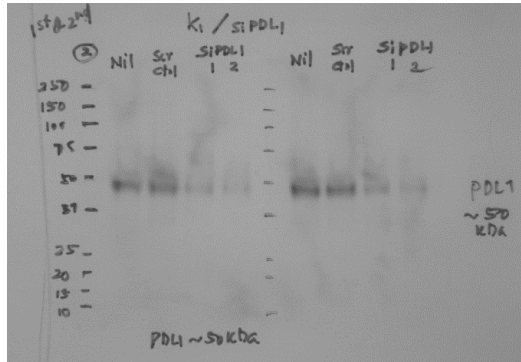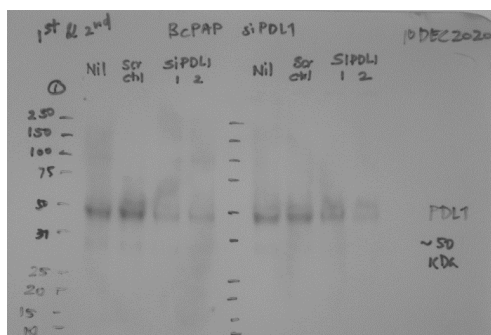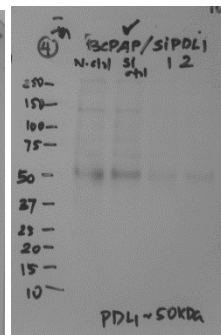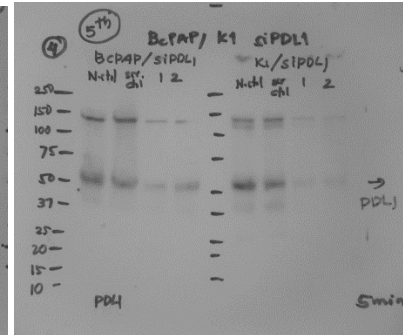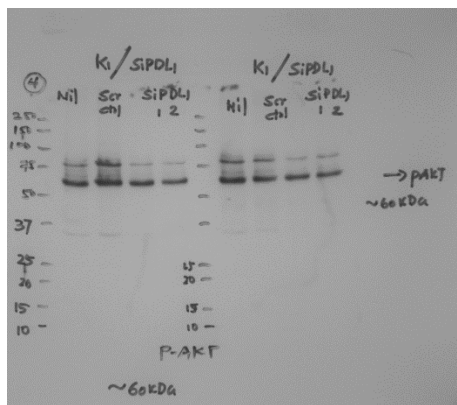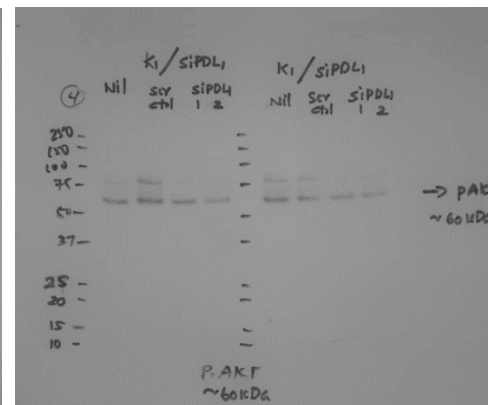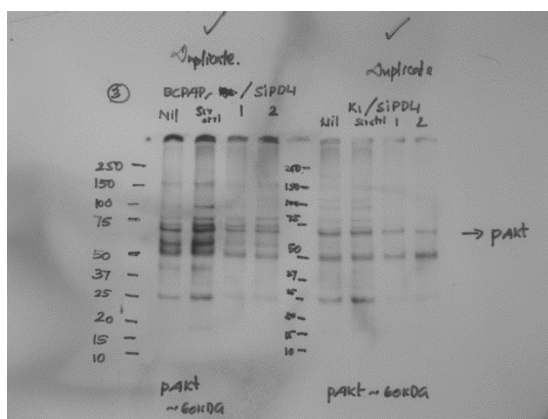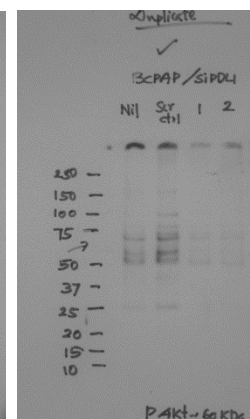

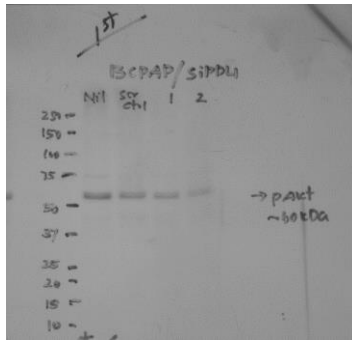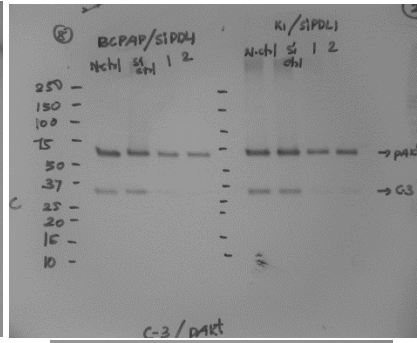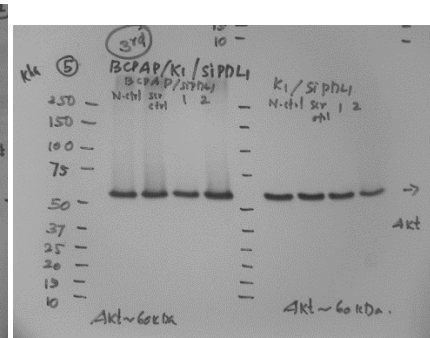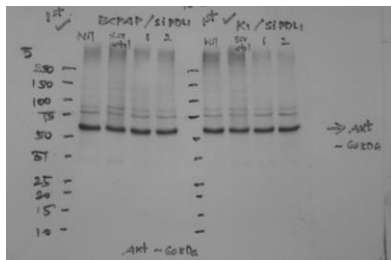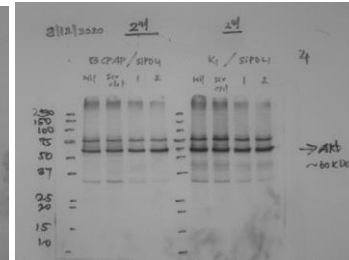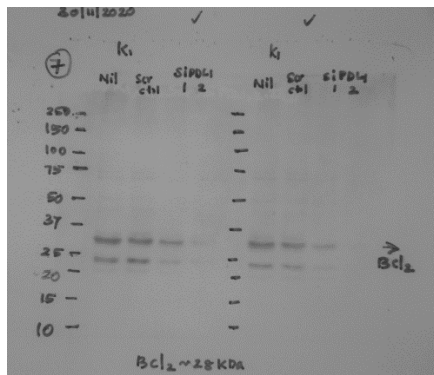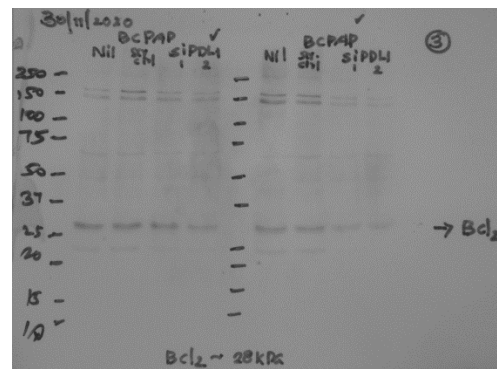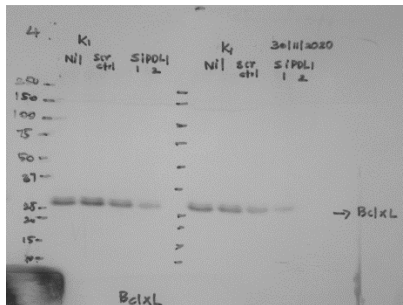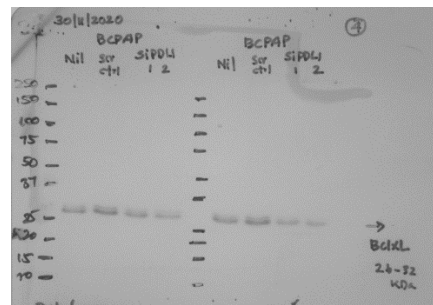

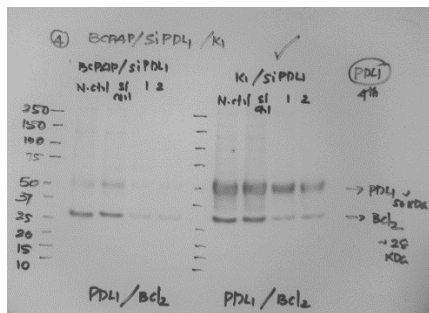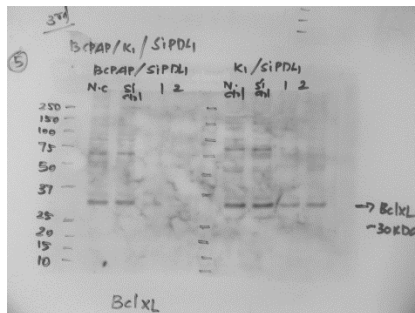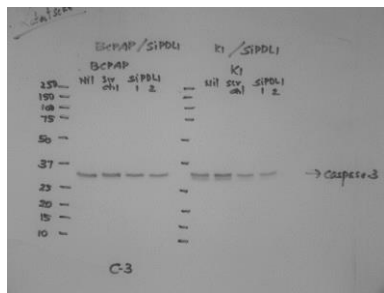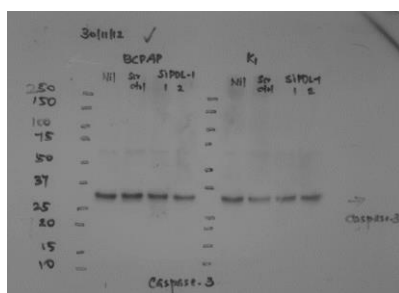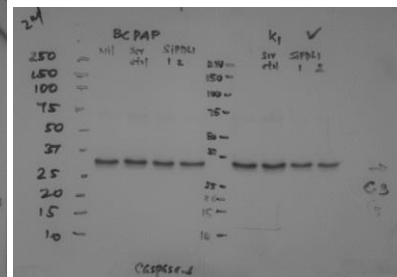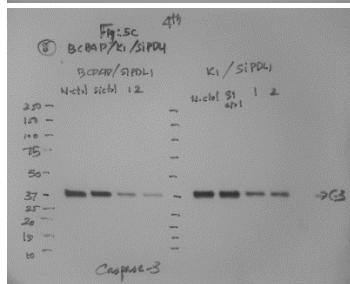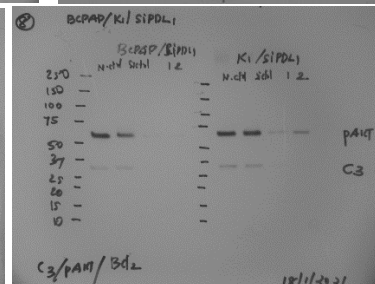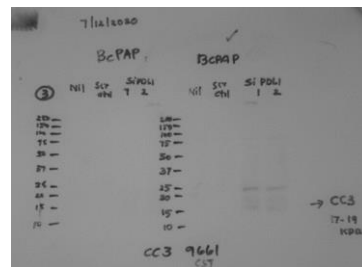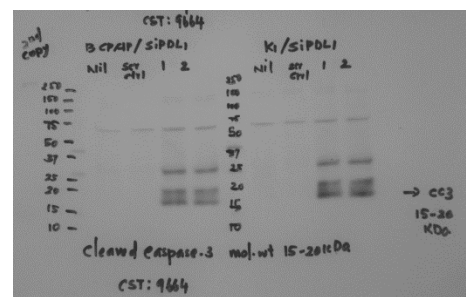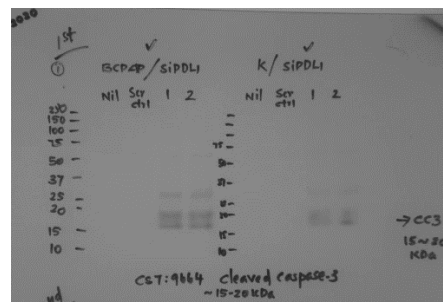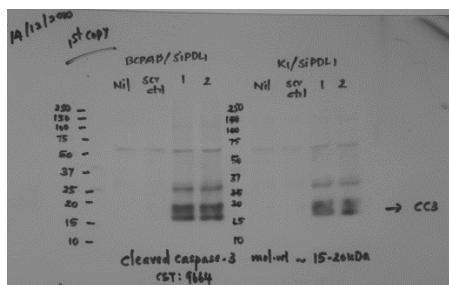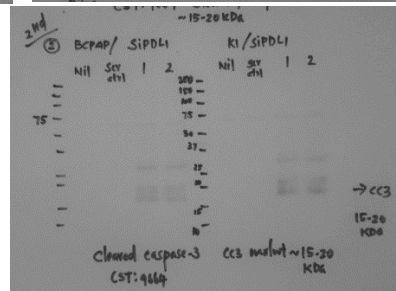

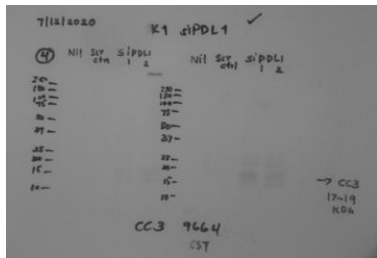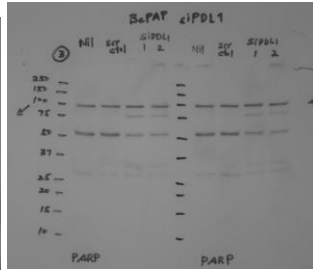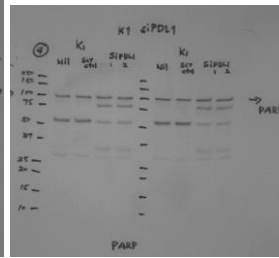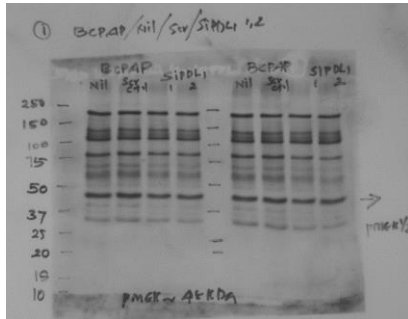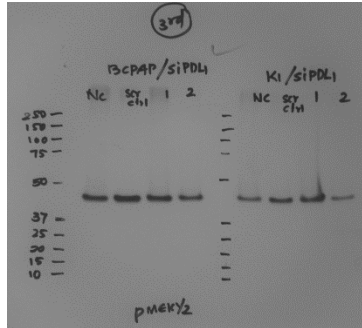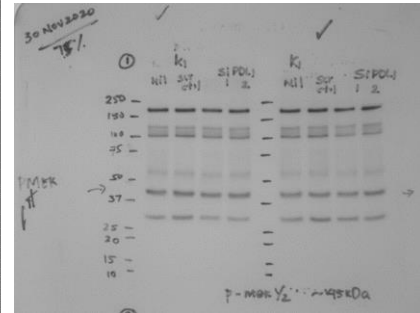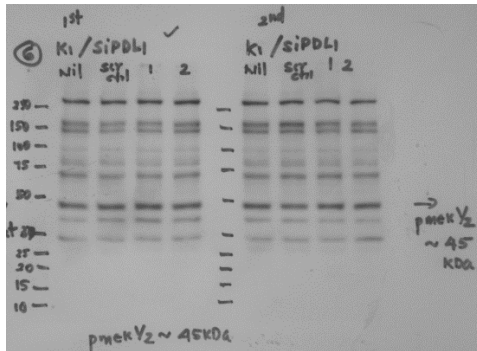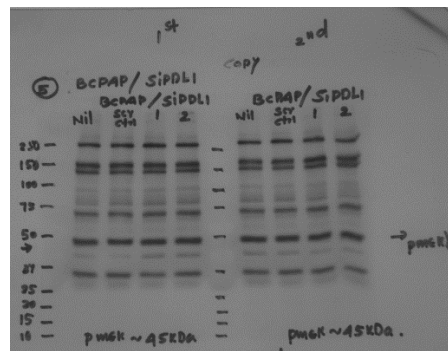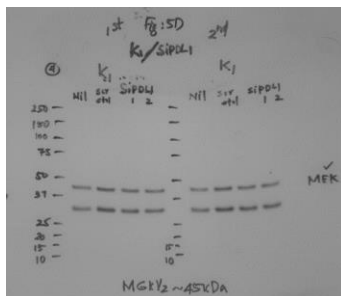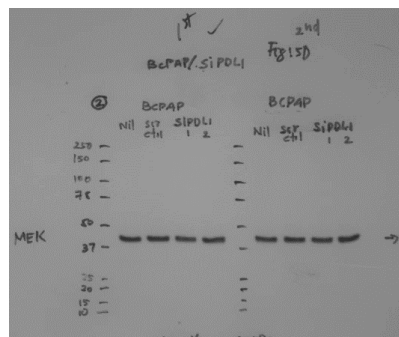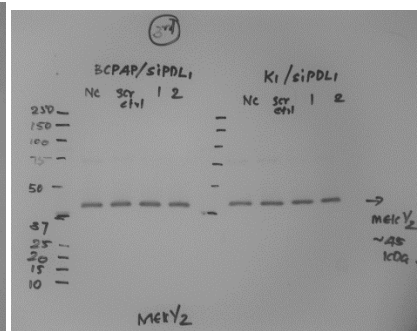

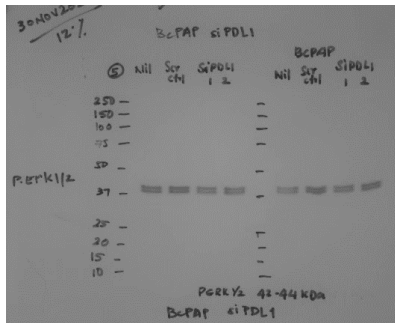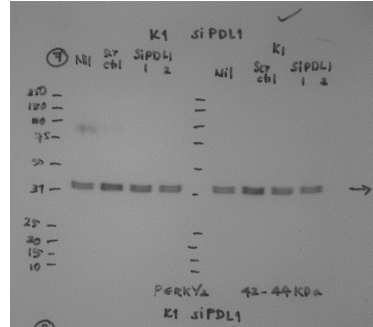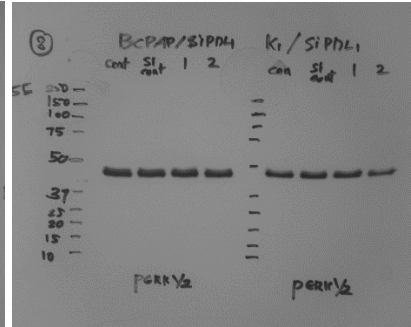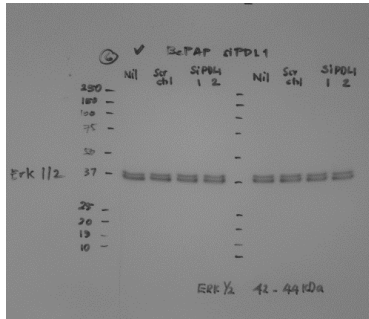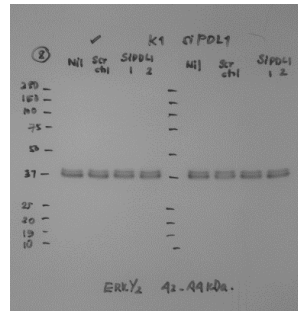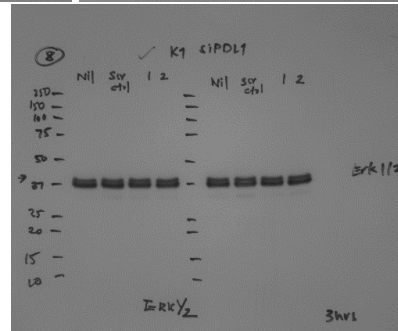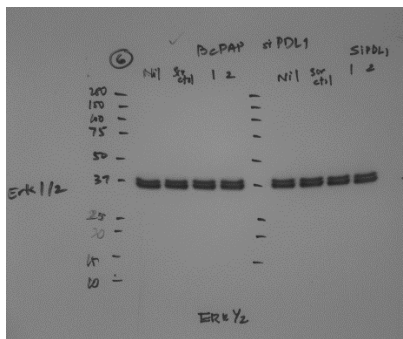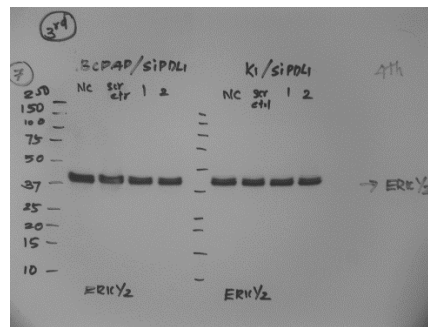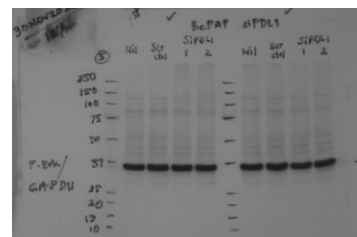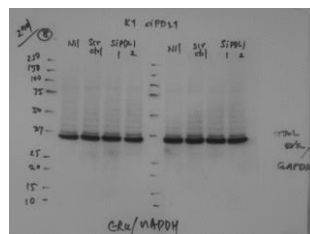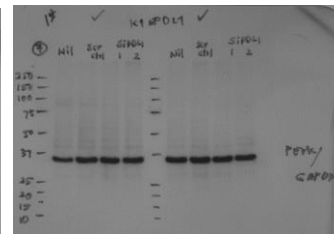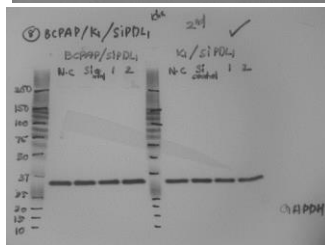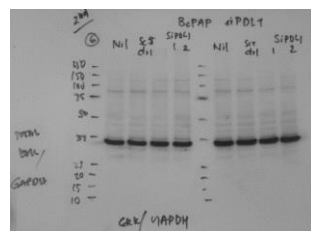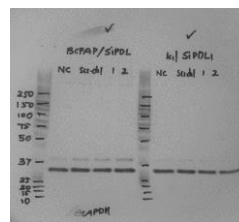

Supplement: s1 [file s1]
